# Supplementary material for: Structural and energetic profiling of SARS-CoV-2 receptor binding domain antibody recognition and the impact of circulating variants
Source: PubMed Central journal article supplement (PMC8448325; doi:10.1371/journal.pcbi.1009380), 2021-09-07
Supplement: pcbi.1009380.s005.pdf [file pcbi.1009380.s005.pdf]

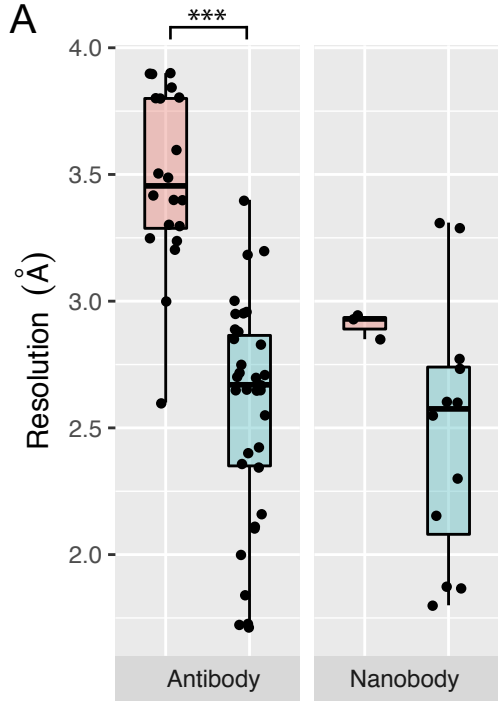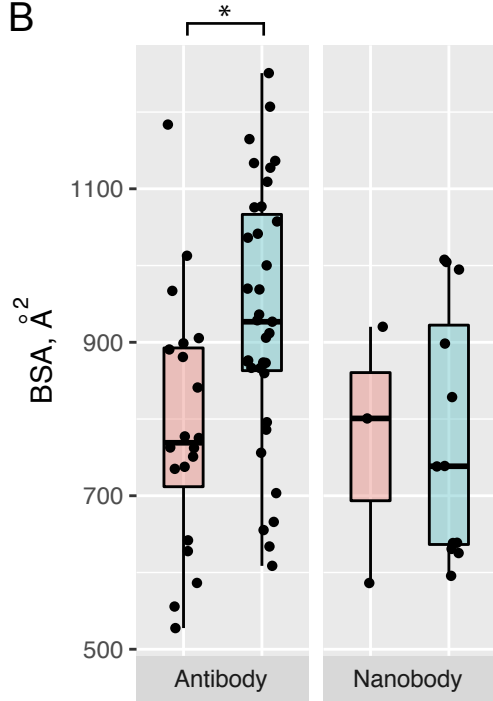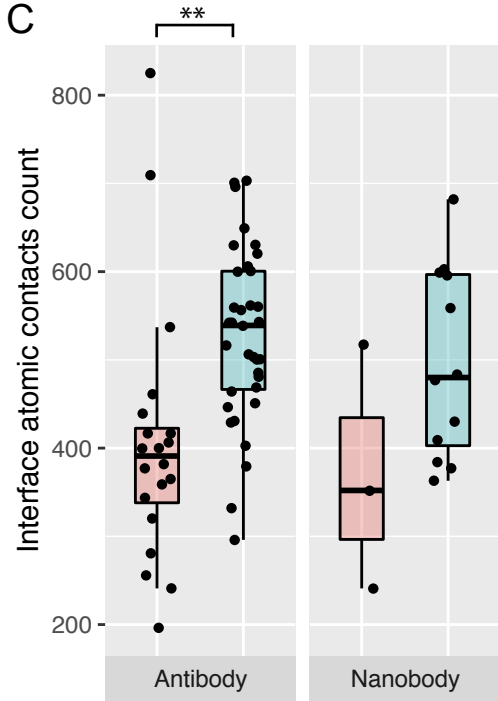

Structure method

Cryo-EM

X-ray diffraction
