# Supplementary material for: Structural and energetic profiling of SARS-CoV-2 receptor binding domain antibody recognition and the impact of circulating variants
Source: PubMed Central journal article supplement (PMC8448325; doi:10.1371/journal.pcbi.1009380), 2021-09-07

K417N

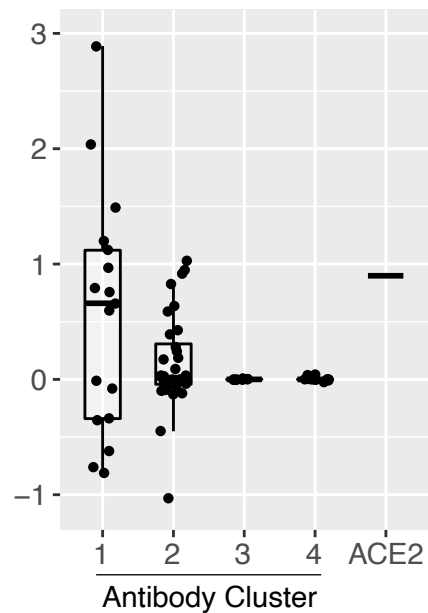

K417T

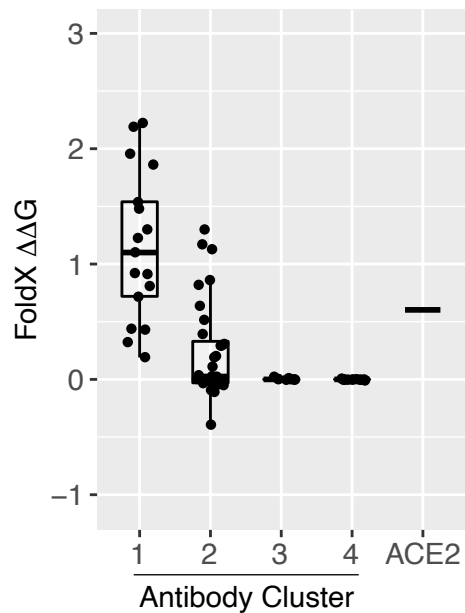

L452R

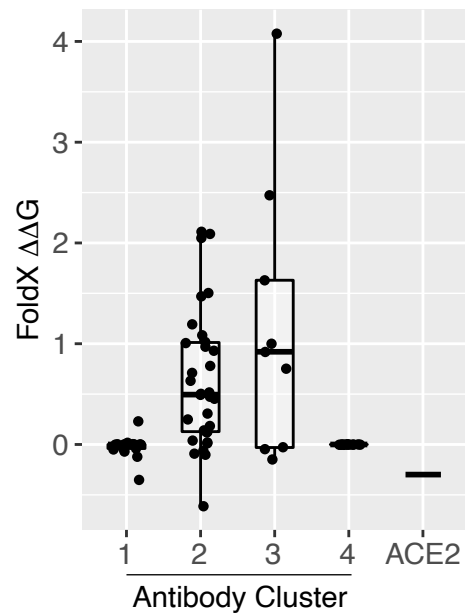

S477N

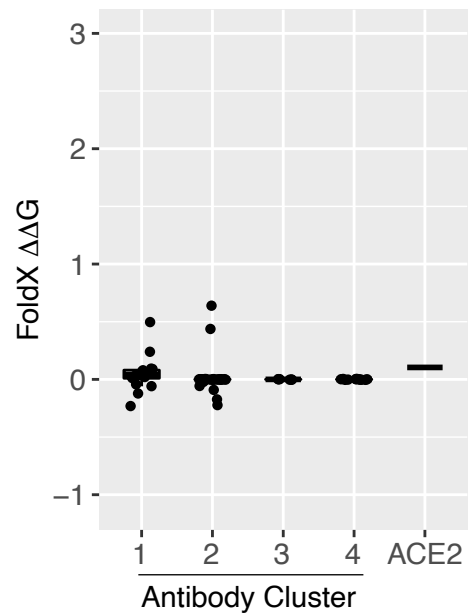

T478K

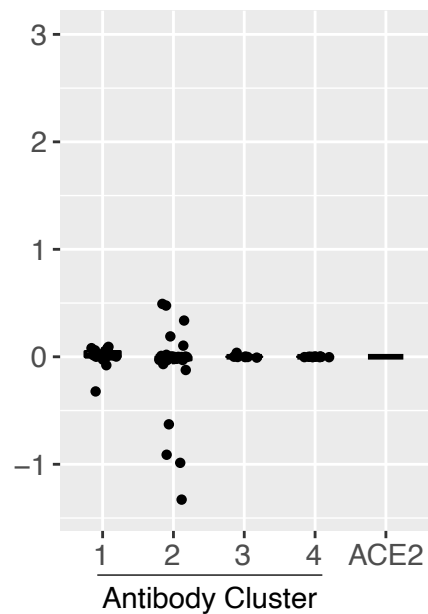

E484K

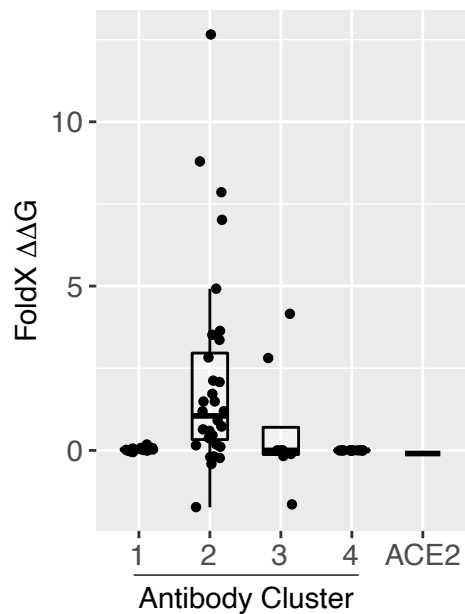

E484Q

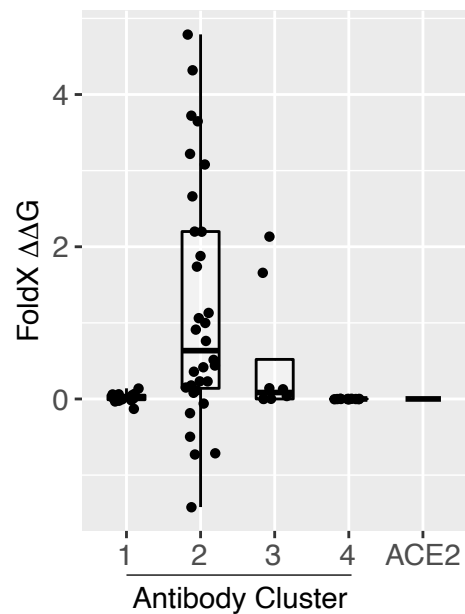

N501Y

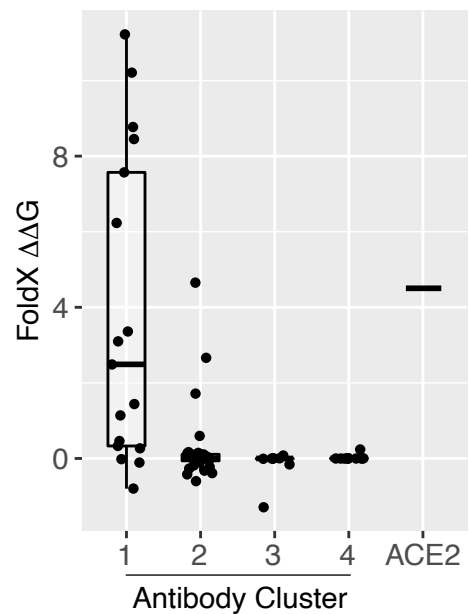

Supplement: pcbi.1009380.s010.pdf [file pcbi.1009380.s010.pdf]
